# Supplementary material for: Obligation to Enhance OBIS Data for Sea- and Shorebirds of the Americas
Source: MDPI journal article supplement (doi:10.3390/d14121099), 2022-12-11
Supplement: s1 [file s1]

Supplementary Table S1. Anatidae species documented per marine ecoregion per decade. Species are listed from greatest to smallest abundance.

|            | Carolinian                                                                  | Gulf of Maine/ Bay of Fundy                                                                                                                       | Northern California                                                                                                                                    | Oregon, Washington, Vancouver Coast and Shelf                                                                                                       | Puget Trough/ Georgia Basin                                                                                                                         | Virginian                                                                                                                                             |
|------------|-----------------------------------------------------------------------------|---------------------------------------------------------------------------------------------------------------------------------------------------|--------------------------------------------------------------------------------------------------------------------------------------------------------|-----------------------------------------------------------------------------------------------------------------------------------------------------|-----------------------------------------------------------------------------------------------------------------------------------------------------|-------------------------------------------------------------------------------------------------------------------------------------------------------|
| <b>70s</b> | NA                                                                          | <i>Branta bernicla</i> ,<br><i>Somateria mollissima</i>                                                                                           | NA                                                                                                                                                     | NA                                                                                                                                                  | NA                                                                                                                                                  | NA                                                                                                                                                    |
| <b>80s</b> | <i>Melanitta nigra</i> ,<br><i>Mergus serattor</i> ,<br><i>Anas discors</i> | <i>Somateria mollissima</i> ,<br><i>Melanitta fusca</i> ,<br><i>Clangula hyemalis</i> ,<br><i>Melanitta nigra</i> , <i>Mergus serattor</i>        | <i>Melanitta perspicillata</i> ,<br><i>Melanitta fusca</i> ,<br><i>Mergus serattor</i>                                                                 | <i>Melanitta perspicillata</i> ,<br><i>Melanitta fusca</i> ,<br><i>Melanitta nigra</i>                                                              | NA                                                                                                                                                  | <i>Melanitta fusca</i> ,<br><i>Melanitta nigra</i> ,<br><i>Clangula hyemalis</i> ,<br><i>Somateria mollissima</i> ,<br><i>Mergus serattor</i>         |
| <b>90s</b> | NA                                                                          | <i>Melanitta fusca</i>                                                                                                                            | <i>Melanitta perspicillata</i> ,<br><i>Bucephala albeola</i> ,<br><i>Melanitta fusca</i> ,<br><i>Aythya valisineria</i> ,<br><i>Anas platyrhynchos</i> | <i>Melanitta perspicillata</i> ,<br><i>Bucephala albeola</i> ,<br><i>Melanitta fusca</i> ,<br><i>Melanitta nigra</i> ,<br><i>Mergus serattor</i>    | <i>Bucephala albeola</i> ,<br><i>Anas americana</i> ,<br><i>Bucephala clangula</i> ,<br><i>Branta bernicla</i> ,<br><i>Bucephala islandica</i>      | <i>Melanitta nigra</i>                                                                                                                                |
| <b>00s</b> | <i>Aix sponsa</i>                                                           | <i>Somateria mollissima</i> ,<br><i>Melanitta fusca</i> ,<br><i>Melanitta nigra</i> ,<br><i>Melanitta perspicillata</i> ,<br><i>Anas rubripes</i> | NA                                                                                                                                                     | <i>Bucephala albeola</i> ,<br><i>Melanitta perspicillata</i> ,<br><i>Mergus serattor</i> ,<br><i>Melanitta fusca</i> ,<br><i>Bucephala clangula</i> | <i>Bucephala albeola</i> ,<br><i>Melanitta perspicillata</i> ,<br><i>Bucephala clangula</i> ,<br><i>Mergus serattor</i> ,<br><i>Melanitta fusca</i> | <i>Clangula hyemalis</i> ,<br><i>Somateria mollissima</i> ,<br><i>Melanitta perspicillata</i> ,<br><i>Melanitta fusca</i> ,<br><i>Melanitta nigra</i> |

|            |                                                                                                                                     |                                                                                                                                        |    |    |    |                                                                                                                                                 |
|------------|-------------------------------------------------------------------------------------------------------------------------------------|----------------------------------------------------------------------------------------------------------------------------------------|----|----|----|-------------------------------------------------------------------------------------------------------------------------------------------------|
| <b>10s</b> | <i>Melanitta americana,</i><br><i>Mergus serattor,</i><br><i>Melanitta fusca,</i><br><i>Aythya marila,</i><br><i>Aythya affinis</i> | <i>Melanitta fusca,</i><br><i>Somateria mollissima,</i><br><i>Melanitta nigra,</i> <i>Mergus serattor,</i><br><i>Clangula hyemalis</i> | NA | NA | NA | <i>Mergus serattor,</i><br><i>Melanitta fusca,</i><br><i>Melanitta nigra,</i><br><i>Melanitta perspicillata,</i><br><i>Somateria mollissima</i> |
|------------|-------------------------------------------------------------------------------------------------------------------------------------|----------------------------------------------------------------------------------------------------------------------------------------|----|----|----|-------------------------------------------------------------------------------------------------------------------------------------------------|

Supplementary Table S2. Laridae species documented per marine ecoregion per decade. Species are listed from greatest to smallest abundance.

|     | Bahamian                                                                                             | Carolinian                                                                                                                                                       | Chiapas-Nicaragua                                                      | Cortezian                                          | Floridian                                                                                                                                                   | Greater Antilles                                                                                     | Gulf of Maine/ Bay of Fundy                                                                                                               | Magdalena Transition | Mexican Tropical Pacific                                 | Nicoya                                                                   | Northern California                                                                                                                               | Northern Gulf of Mexico                                                                                                                                         | Oregon, Washington, Vancouver Coast and Shelf                                                                                                                                   | Panama Bight                                                                  | Puget Trough/ Georgia Basin                                                                                                                | Southeast ern Brazil     | Southern California Bight                                                                                           | Southern Gulf of Mexico                                                                                                              | Southwest Caribbean              | Virginian                                                                                                                                                               |
|-----|------------------------------------------------------------------------------------------------------|------------------------------------------------------------------------------------------------------------------------------------------------------------------|------------------------------------------------------------------------|----------------------------------------------------|-------------------------------------------------------------------------------------------------------------------------------------------------------------|------------------------------------------------------------------------------------------------------|-------------------------------------------------------------------------------------------------------------------------------------------|----------------------|----------------------------------------------------------|--------------------------------------------------------------------------|---------------------------------------------------------------------------------------------------------------------------------------------------|-----------------------------------------------------------------------------------------------------------------------------------------------------------------|---------------------------------------------------------------------------------------------------------------------------------------------------------------------------------|-------------------------------------------------------------------------------|--------------------------------------------------------------------------------------------------------------------------------------------|--------------------------|---------------------------------------------------------------------------------------------------------------------|--------------------------------------------------------------------------------------------------------------------------------------|----------------------------------|-------------------------------------------------------------------------------------------------------------------------------------------------------------------------|
| 60s | NA                                                                                                   | NA                                                                                                                                                               | NA                                                                     | NA                                                 | NA                                                                                                                                                          | NA                                                                                                   | <i>Larus argentatus</i> ,<br><i>Larus marinus</i> ,<br><i>Rissa tridactyla</i> ,<br><i>Larus atricilla</i> ,<br><i>Larus philadelphia</i> | NA                   | NA                                                       | NA                                                                       | NA                                                                                                                                                | NA                                                                                                                                                              | NA                                                                                                                                                                              | NA                                                                            | NA                                                                                                                                         | NA                       | NA                                                                                                                  | NA                                                                                                                                   | NA                               | NA                                                                                                                                                                      |
| 70s | <i>Onychopri<br/>on fuscatus</i> ,<br><i>Sternula albifrons</i>                                      | NA                                                                                                                                                               | <i>Onychopri<br/>on fuscatus</i> ,<br><i>Onychopri<br/>on fuscatus</i> | NA                                                 | NA                                                                                                                                                          | <i>Onychopri<br/>on fuscatus</i>                                                                     | <i>Larus argentatus</i> ,<br><i>Larus marinus</i> ,<br><i>Rissa tridactyla</i>                                                            | <i>Xema sabini</i>   | <i>Onychopri<br/>on fuscatus</i> ,<br><i>Xema sabini</i> | <i>Onychopri<br/>on fuscatus</i> ,<br><i>Onychopri<br/>on anaethetus</i> | <i>Larus occidentalis</i>                                                                                                                         | NA                                                                                                                                                              | <i>Larus glaucescen<br/>s</i> , <i>Larus occidentali<br/>s</i> , <i>Rissa tridactyla</i>                                                                                        | <i>Onychopri<br/>on anaethe<br/>tus</i> ,<br><i>Onychopri<br/>on fuscatus</i> | NA                                                                                                                                         | NA                       | <i>Rissa tridactyla</i> ,<br><i>Larus argentatus</i> ,<br><i>Larus occidentalis</i> ,<br><i>Larus californicus</i>  | NA                                                                                                                                   | <i>Onychopri<br/>on fuscatus</i> | <i>Larus argentatus</i> ,<br><i>Rissa tridactyla</i> ,<br><i>Larus marinus</i> ,<br><i>Larus hyperboreus</i>                                                            |
| 80s | <i>Onychopri<br/>on anaethetus</i> ,<br><i>Larus atricilla</i>                                       | <i>Larus argentatus</i> ,<br><i>Larus atricilla</i> ,<br><i>Onychopri<br/>on anaethetus</i> ,<br><i>Larus philadelphia</i> ,<br><i>Onychopri<br/>on fuscatus</i> | NA                                                                     | <i>Larus heerman<br/>nii</i> , <i>Larus livens</i> | <i>Sternula albifrons</i> , <i>Larus atricilla</i> , <i>Larus argentatus</i> ,<br><i>Onychopri<br/>on anaethetus</i>                                        | NA                                                                                                   | <i>Larus argentatus</i> ,<br><i>Larus marinus</i> ,<br><i>Rissa tridactyla</i> ,<br><i>Larus atricilla</i> ,<br><i>Larus delawarensis</i> | NA                   | NA                                                       | NA                                                                       | <i>Larus occidentalis</i> ,<br><i>Larus californicus</i> ,<br><i>Rissa tridactyla</i> ,<br><i>Larus argentatus</i> ,<br><i>Larus philadelphia</i> | <i>Larus atricilla</i>                                                                                                                                          | <i>Larus occidentali<br/>s</i> , <i>Larus californicus</i> ,<br><i>Rissa tridactyla</i> ,<br><i>Larus argentatus</i> ,<br><i>Larus glaucescen<br/>s</i>                         | NA                                                                            | NA                                                                                                                                         | NA                       | <i>Larus californicus</i> ,<br><i>Larus occidentalis</i> ,<br><i>Larus heermanni</i> ,<br><i>Larus philadelphia</i> | NA                                                                                                                                   | NA                               | <i>Larus argentatus</i> ,<br><i>Larus marinus</i> ,<br><i>Rissa tridactyla</i> ,<br><i>Larus atricilla</i> ,<br><i>Larus hyperboreus</i> ,<br><i>Larus delawarensis</i> |
| 90s | <i>Onychopri<br/>on fuscatus</i>                                                                     | <i>Onychopri<br/>on anaethetus</i> ,<br><i>Onychopri<br/>on fuscatus</i> , <i>Larus argentatus</i> ,<br><i>Rissa tridactyla</i> ,<br><i>Larus philadelphia</i>   | NA                                                                     | <i>Larus heerman<br/>nii</i> , <i>Larus livens</i> | <i>Onychopri<br/>on fuscatus</i> , <i>Larus atricilla</i> , <i>Larus argentatus</i> ,<br><i>Onychopri<br/>on anaethetus</i> ,<br><i>Sternula antillarum</i> | <i>Onychopri<br/>on fuscatus</i> ,<br><i>Onychopri<br/>on anaethetus</i> ,<br><i>Larus atricilla</i> | <i>Larus marinus</i> ,<br><i>Larus argentatus</i> ,<br><i>Rissa tridactyla</i> ,<br><i>Larus fuscus</i>                                   | NA                   | NA                                                       | NA                                                                       | <i>Larus occidentalis</i> ,<br><i>Larus californicus</i> ,<br><i>Larus heermanni</i> ,<br><i>Larus argentatus</i> ,<br><i>Larus glaucescens</i>   | <i>Larus atricilla</i> ,<br><i>Onychopri<br/>on fuscatus</i> ,<br><i>Larus heermanni</i> ,<br><i>Onychopri<br/>on anaethetus</i> ,<br><i>Larus delawarensis</i> | <i>Larus glaucescen<br/>s</i> , <i>Larus occidentali<br/>s</i> , <i>Larus californicus</i> ,<br><i>Larus heermanni</i> ,<br><i>Larus argentatus</i> ,<br><i>Larus heermanni</i> | NA                                                                            | <i>Larus glaucescens</i> ,<br><i>Larus canus</i> ,<br><i>Larus philadelphia</i> ,<br><i>Larus heermanni</i> ,<br><i>Hydroprogne caspia</i> | NA                       | <i>Larus occidentalis</i> ,<br><i>Larus heermanni</i>                                                               | <i>Larus atricilla</i> ,<br><i>Onychopri<br/>on fuscatus</i> ,<br><i>Onychopri<br/>on anaethetus</i> ,<br><i>Sternula antillarum</i> | NA                               | <i>Onychopri<br/>on anaethetus</i> ,<br><i>Onychopri<br/>on fuscatus</i> , <i>Rissa tridactyla</i> ,<br><i>Larus argentatus</i> ,<br><i>Larus marinus</i>               |
| 00s | <i>Onychopri<br/>on fuscatus</i> ,<br><i>Onychopri<br/>on anaethetus</i> ,<br><i>Larus atricilla</i> | <i>Onychopri<br/>on fuscatus</i> ,<br><i>Onychopri<br/>on anaethetus</i> ,<br><i>Larus atricilla</i> ,<br><i>Sternula albifrons</i> , <i>Xema sabini</i>         | NA                                                                     | <i>Larus heerman<br/>nii</i>                       | <i>Onychopri<br/>on fuscatus</i> ,<br><i>Onychopri<br/>on anaethetus</i> ,<br><i>Sternula antillarum</i> ,<br><i>Hydroprogne caspia</i>                     | <i>Onychopri<br/>on fuscatus</i>                                                                     | <i>Larus marinus</i> ,<br><i>Larus argentatus</i> ,<br><i>Larus atricilla</i> ,<br><i>Rissa tridactyla</i> ,<br><i>Larus philadelphia</i> | NA                   | NA                                                       | NA                                                                       | NA                                                                                                                                                | <i>Larus atricilla</i> ,<br><i>Onychopri<br/>on fuscatus</i> ,<br><i>Onychopri<br/>on anaethetus</i> ,<br><i>Hydroprogne caspia</i>                             | <i>Larus glaucescen<br/>s</i> , <i>Larus canus</i> ,<br><i>Larus heermanni</i> ,<br><i>Larus argentatus</i> ,<br><i>Larus heermanni</i>                                         | <i>Larus atricilla</i>                                                        | <i>Larus glaucescens</i> ,<br><i>Larus canus</i> ,<br><i>Larus philadelphia</i> ,<br><i>Larus argentatus</i>                               | <i>Larus dominicanus</i> | NA                                                                                                                  | <i>Onychopri<br/>on fuscatus</i> ,<br><i>Larus atricilla</i> ,<br><i>Onychopri<br/>on anaethetus</i>                                 | NA                               | <i>Larus argentatus</i> ,<br><i>Larus atricilla</i> ,<br><i>Larus marinus</i> ,<br><i>Larus philadelphia</i> ,<br><i>Rissa tridactyla</i>                               |

|            |    |                                                                                           |    |    |                                                                          |    |                                                                                               |    |    | <i>Rissa tridactyla</i> | <i>Larus delawarensis</i> |                                                                         |    |                         |    |    |    |                                              |                                                                                               |
|------------|----|-------------------------------------------------------------------------------------------|----|----|--------------------------------------------------------------------------|----|-----------------------------------------------------------------------------------------------|----|----|-------------------------|---------------------------|-------------------------------------------------------------------------|----|-------------------------|----|----|----|----------------------------------------------|-----------------------------------------------------------------------------------------------|
| <b>10s</b> | NA | <i>Larus philadelphia, Larus argentatus, Larus atricilla, Larus marinus, Larus fuscus</i> | NA | NA | <i>Onychoprion fuscatus, Onychoprion anaethetus, Sternula antillarum</i> | NA | <i>Larus argentatus, Larus marinus, Rissa tridactyla, Larus atricilla, Larus philadelphia</i> | NA | NA | NA                      | NA                        | <i>Larus argentatus, Larus argentatus, Larus heermanni, Xema sabini</i> | NA | <i>Larus argentatus</i> | NA | NA | NA | <i>Larus atricilla, Onychoprion fuscatus</i> | <i>Larus argentatus, Larus philadelphia, Larus marinus, Rissa tridactyla, Larus atricilla</i> |

Supplementary Table S3. Shorebird families Scolopacidae and Charadriidae and the marine ecoregions in which they were documented.

| <b>Marine Ecoregions</b>                             | <b>Shorebird Presence (Concerning Families Charadriidae, Scolopacidae)</b> |
|------------------------------------------------------|----------------------------------------------------------------------------|
| <b>Carolinian</b>                                    | Charadriidae, Scolopacidae                                                 |
| <b>Cortezian</b>                                     | Charadriidae                                                               |
| <b>Gulf of Maine/Bay of Fundy</b>                    | Charadriidae, Scolopacidae                                                 |
| <b>Northern California</b>                           | Scolopacidae                                                               |
| <b>Oregon, Washington, Vancouver Coast and Shelf</b> | Charadriidae, Scolopacidae                                                 |
| <b>Panama Bight</b>                                  | Charadriidae, Scolopacidae                                                 |
| <b>Puget Trough Georgia Basin</b>                    | Charadriidae, Scolopacidae                                                 |
| <b>Southeastern Brazil</b>                           | Charadriidae                                                               |
| <b>Southwestern Caribbean</b>                        | Scolopacidae                                                               |
| <b>Virginian</b>                                     | Charadriidae, Scolopacidae                                                 |
